# Supplementary material
Source: PubMed Central journal article supplement (PMC5644462)
Supplement: supp_WNL.0000000000004521_e-tables.pdf [file supp_WNL.0000000000004521_e-tables.pdf]

Table e-1. Number of participants with possible or definite primary age-related tauopathy at autopsy

| Classification | Global CDR <sup>a</sup> | CERAD semiquantitative neuritic plaque score | Braak stage |    |    |     |    |    | total |    |
|----------------|-------------------------|----------------------------------------------|-------------|----|----|-----|----|----|-------|----|
|                |                         |                                              | 0           | I  | II | III | IV | V  |       | VI |
| PART, definite | 0                       | none                                         | 8           | 18 | 21 | 15  | 10 | 0  | 0     | 72 |
|                | 0.5                     | none                                         | 5           | 5  | 11 | 4   | 11 | 2  | 1     | 39 |
|                | 1                       | none                                         | 2           | 6  | 7  | 4   | 6  | 0  | 3     | 28 |
|                | 2                       | none                                         | 1           | 5  | 3  | 8   | 2  | 0  | 0     | 19 |
|                | 3                       | none                                         | 4           | 0  | 3  | 2   | 2  | 1  | 0     | 12 |
| Amyloid sparse | 0                       | sparse                                       | 1           | 8  | 14 | 8   | 9  | 1  | 1     | 42 |
|                | 0.5                     | sparse                                       | 1           | 5  | 8  | 15  | 17 | 1  | 5     | 52 |
|                | 1                       | sparse                                       | 2           | 2  | 6  | 4   | 15 | 2  | 1     | 32 |
|                | 2                       | sparse                                       | 0           | 2  | 6  | 3   | 10 | 10 | 10    | 41 |
|                | 3                       | sparse                                       | 0           | 1  | 2  | 3   | 7  | 6  | 21    | 40 |

Abbreviations: PART = primary age-related tauopathy; CDR = clinical dementia rating; CERAD = Consortium to Establish a Registry for Alzheimer's Disease

<sup>a</sup> CDR at last visit before death, within 1 year of autopsy

Table e-2. Adjusted odds of symptomatic primary age-related tauopathy (definite and possible combined), including Braak stage 0-VI

| Test                                                              | Adjusted analysis |                  |                  |
|-------------------------------------------------------------------|-------------------|------------------|------------------|
|                                                                   | OR                | 95% CI           | p-value          |
| Age at last visit (years)                                         | 0.99              | 0.95-1.04        | 0.77             |
| Education (years)                                                 | 0.93              | 0.86-1.01        | 0.08             |
| <i>APOE</i> (at least one $\epsilon$ 4 vs no $\epsilon$ 4 allele) | 1.80              | 0.75-4.36        | 0.19             |
| Depression                                                        | <b>3.66</b>       | <b>2.10-6.38</b> | <b>&lt;.0001</b> |
| History of stroke (yes vs no)                                     | <b>3.68</b>       | <b>1.82-7.44</b> | <b>0.0003</b>    |
| History of diabetes (yes vs no)                                   | 0.67              | 0.29-1.56        | 0.36             |
| Braak stage (0 through VI)                                        | <b>1.60</b>       | <b>1.32-1.94</b> | <b>&lt;.0001</b> |
| Diffuse plaques (any vs none)                                     | 0.99              | 0.57-1.70        | 0.96             |
| Microinfarct (yes vs no)                                          | 1.48              | 0.87-2.52        | 0.15             |
| Amyloid angiopathy                                                | 1.94              | 0.98-3.83        | 0.06             |

Abbreviations: PART= primary age-related tauopathy; OR = odds ratio; CI = confidence interval; *APOE* = apolipoprotein E

Table e-3. Adjusted odds of symptomatic primary age-related tauopathy, including Braak stage 0-VI but restricted to those with no hippocampal sclerosis

| Test                                          | PART, definite |                   |               | Amyloid sparse |                  |              |
|-----------------------------------------------|----------------|-------------------|---------------|----------------|------------------|--------------|
|                                               | OR             | 95% CI            | p-value       | OR             | 95% CI           | p-value      |
| Age at last visit (years)                     | 0.96           | 0.92-1.00         | 0.05          | 1.08           | 1.00-1.16        | 0.06         |
| Education (years)                             | 1.03           | 0.90-1.19         | 0.64          | <b>0.81</b>    | <b>0.67-0.98</b> | <b>0.03</b>  |
| <i>APOE</i> (at least one ε4 vs no ε4 allele) | 3.04           | 0.98-9.38         | 0.05          | 2.73           | 0.36-20.65       | 0.33         |
| Depression                                    | <b>3.59</b>    | <b>1.73-7.45</b>  | <b>0.0006</b> | 6.87           | 0.38-124.91      | 0.19         |
| History of stroke (yes vs no)                 | <b>9.62</b>    | <b>2.63-35.23</b> | <b>0.0006</b> | 1.32           | 0.41-4.27        | 0.64         |
| History of diabetes (yes vs no)               | 0.42           | 0.12-1.53         | 0.19          | 3.37           | 0.55-20.47       | 0.19         |
| Braak stage 0 through 6                       | <b>1.52</b>    | <b>1.07-2.15</b>  | <b>0.02</b>   | <b>2.00</b>    | <b>1.10-3.64</b> | <b>0.02</b>  |
| Diffuse plaques (yes vs no)                   | 0.48           | 0.19-1.19         | 0.11          | 0.24           | 0.01-5.12        | 0.36         |
| Microinfarct (yes vs no)                      | 1.28           | 0.57-2.86         | 0.55          | 1.49           | 0.51-4.36        | 0.46         |
| Amyloid angiopathy                            | 1.18           | 0.40-3.44         | 0.76          | <b>3.41</b>    | <b>1.43-8.12</b> | <b>0.006</b> |

Abbreviations: PART= primary age-related tauopathy; OR = odds ratio; CI = confidence interval; *APOE* = apolipoprotein E

Table e-4. Adjusted odds of symptomatic primary age-related tauopathy (definite and possible combined), excluding Braak stage V-VI

| Test                                                              | Adjusted analysis |                  |                  |
|-------------------------------------------------------------------|-------------------|------------------|------------------|
|                                                                   | OR                | 95% CI           | p-value          |
| Age at last visit (years)                                         | 1.00              | 0.96-1.04        | 0.97             |
| Education (years)                                                 | <b>0.92</b>       | <b>0.85-1.00</b> | <b>0.04</b>      |
| <i>APOE</i> (at least one $\epsilon$ 4 vs no $\epsilon$ 4 allele) | 1.63              | 0.70-3.80        | 0.26             |
| Depression                                                        | <b>3.72</b>       | <b>2.09-6.63</b> | <b>&lt;.0001</b> |
| History of stroke                                                 | <b>3.54</b>       | <b>1.77-7.07</b> | <b>0.0003</b>    |
| History of diabetes (yes vs no)                                   | 0.71              | 0.30-1.68        | 0.43             |
| Braak stage (0 through VI)                                        | <b>1.40</b>       | <b>1.13-1.72</b> | <b>0.002</b>     |
| Diffuse plaques (any vs none)                                     | 1.09              | 0.64-1.87        | 0.74             |
| Microinfarct (yes vs no)                                          | 1.41              | 0.87-2.29        | 0.17             |
| Amyloid angiopathy                                                | 1.71              | 0.91-3.21        | 0.10             |

Abbreviations: PART= primary age-related tauopathy; OR = odds ratio; CI = confidence interval; *APOE* = apolipoprotein E

Table e-5. Adjusted odds of symptomatic (clinical diagnosis of cognitive impairment) primary age-related tauopathy, including Braak stage 0-VI

| Test                                          | PART, definite |                   |                   | Amyloid sparse |                  |              |
|-----------------------------------------------|----------------|-------------------|-------------------|----------------|------------------|--------------|
|                                               | OR             | 95% CI            | p-value           | OR             | 95% CI           | p-value      |
| Age at last visit (years)                     | <b>0.96</b>    | <b>0.93-1.00</b>  | <b>0.04</b>       | 1.06           | 0.99-1.15        | 0.11         |
| Education (years)                             | 1.03           | 0.91-1.15         | 0.67              | <b>0.80</b>    | <b>0.66-0.96</b> | <b>0.02</b>  |
| <i>APOE</i> (at least one ε4 vs no ε4 allele) | 2.14           | 0.91-5.01         | 0.08              | 2.77           | 0.55-13.95       | 0.22         |
| Depression                                    | <b>3.54</b>    | <b>2.03-6.17</b>  | <b>&lt;0.0001</b> | 5.34           | 0.69-41.29       | 0.11         |
| History of stroke (yes vs no)                 | <b>7.63</b>    | <b>2.81-20.77</b> | <b>&lt;0.0001</b> | 1.02           | 0.39-2.68        | 0.97         |
| History of diabetes (yes vs no)               | 0.55           | 0.16-1.92         | 0.35              | 1.47           | 0.33-6.50        | 0.61         |
| Braak stage 0 through 6                       | 1.30           | 0.94-1.81         | 0.11              | <b>1.90</b>    | <b>1.07-3.37</b> | <b>0.03</b>  |
| Diffuse plaques (yes vs no)                   | 0.53           | 0.24-1.15         | 0.11              | 0.29           | 0.02-4.34        | 0.37         |
| Microinfarct (yes vs no)                      | 1.42           | 0.59-3.46         | 0.43              | 1.06           | 0.44-2.59        | 0.89         |
| Amyloid angiopathy                            | 1.69           | 0.67-4.27         | 0.27              | <b>3.13</b>    | <b>1.43-6.83</b> | <b>0.004</b> |

Abbreviations: PART= primary age-related tauopathy; OR = odds ratio; CI = confidence interval; *APOE* = apolipoprotein E

Table e-6. Adjusted odds of symptomatic primary age-related tauopathy, including previously excluded comorbidities as covariates

| Test                                                              | PART, definite |                    |               | Amyloid sparse |                    |              |
|-------------------------------------------------------------------|----------------|--------------------|---------------|----------------|--------------------|--------------|
|                                                                   | OR             | 95% CI             | p-value       | OR             | 95% CI             | p-value      |
| Age at last visit (years)                                         | 0.98           | 0.95-1.02          | 0.39          | 1.05           | 1.00-1.11          | 0.05         |
| Education (years)                                                 | 1.02           | 0.93-1.11          | 0.70          | 0.89           | 0.75-1.05          | 0.18         |
| Male sex                                                          | 1.97           | 0.87-4.47          | 0.11          | <b>2.29</b>    | <b>1.19-4.43</b>   | <b>0.02</b>  |
| <i>APOE</i> (at least one $\epsilon$ 4 vs no $\epsilon$ 4 allele) | 1.70           | 0.86-3.38          | 0.13          | 2.09           | 0.49-8.93          | 0.32         |
| Depression                                                        | <b>3.15</b>    | <b>1.71-5.82</b>   | <b>0.0002</b> | <b>9.40</b>    | <b>1.28-68.80</b>  | <b>0.03</b>  |
| History of hypertension (yes vs no)                               | 0.62           | 0.30-1.29          | 0.20          | 0.49           | 0.17-1.37          | 0.17         |
| Family history of cognitive impairment (yes vs no)                | 1.23           | 0.62-2.43          | 0.55          | 1.10           | 0.58-2.08          | 0.78         |
| History of diabetes (yes vs no)                                   | 0.62           | 0.36-1.08          | 0.09          | 0.65           | 0.24-1.81          | 0.41         |
| Braak stage 0 through 6                                           | <b>1.42</b>    | <b>1.08-1.87</b>   | <b>0.01</b>   | <b>1.60</b>    | <b>1.19-2.15</b>   | <b>0.002</b> |
| Diffuse plaques (yes vs no)                                       | 0.52           | 0.26-1.05          | 0.07          | 0.59           | 0.06-6.00          | 0.66         |
| Tau pathologies                                                   | <b>26.90</b>   | <b>2.99-241.87</b> | <b>0.003</b>  | NA             | NA                 | NA           |
| Other neurodegenerative disease                                   | <b>21.48</b>   | <b>3.23-142.67</b> | <b>0.002</b>  | <b>13.54</b>   | <b>1.62-113.34</b> | <b>0.02</b>  |
| Lewy body disease                                                 | 1.91           | 0.78-4.71          | 0.16          | <b>4.64</b>    | <b>1.34-16.07</b>  | <b>0.02</b>  |

Abbreviations: PART= primary age-related tauopathy; OR = odds ratio; CI = confidence interval; *APOE* = apolipoprotein E; NA = Not applicable
