# Supplementary material
Source: PubMed Central journal article supplement (PMC5644462)
Supplement: supp_WNL.0000000000004521_Figure_e-1.pdf [file supp_WNL.0000000000004521_Figure_e-1.pdf]

**Figure e-1. Sample size flowchart**

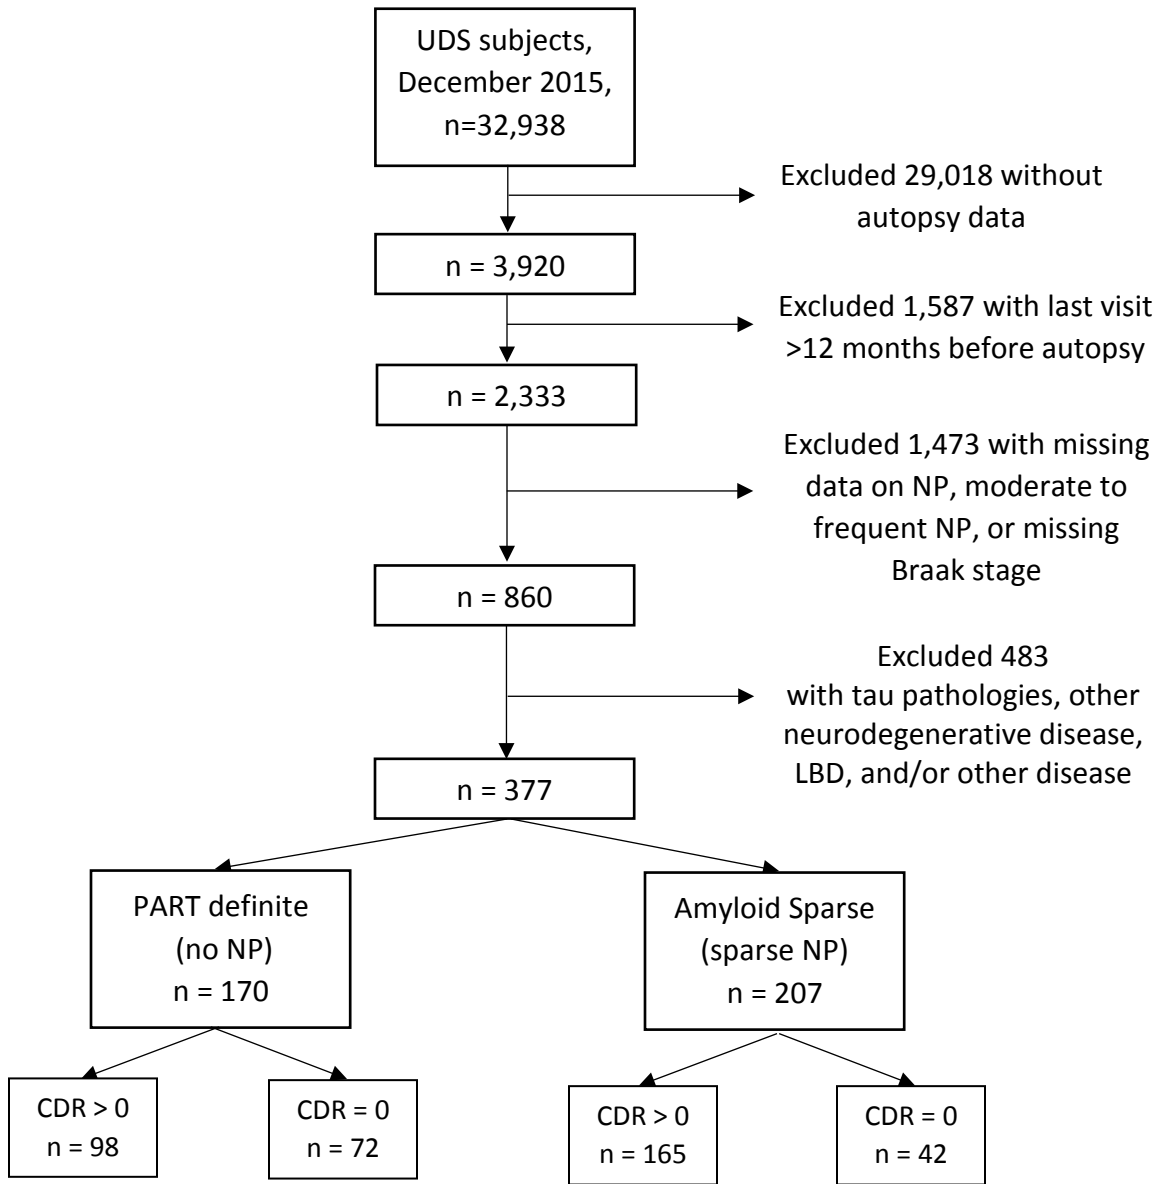

Abbreviations: UDS = Uniform Data Set; PART = primary age-related tauopathy; NP = neuritic plaques; CDR = Clinical Dementia Rating; LBD = Lewy body disease
